# Supplementary material
Source: publisher site journal article supplement (https://www.dovepress.com/article/588367)
Supplement: Supplementary file 1 [file 588367%20Revised%20Supplementary%20Material.docx]

***Supplementary Material***

**Contents:**

**Figure S1：**Distribution of missing clinical data of 844 patients.

**Figure S2：**Multicollinearity check.

**Figure S3：**ROC curve for bootstrap validation.

**Figure S1：**Distribution of missing clinical data of 844 patients

**Abbreviations:** NSAIDs non-steroidal anti-inflammatory drugs; ACEI/ARB, angiotensin-converting enzyme inhibitors and angiotensin receptor blockers; WBC, white blood cells; RBC, red blood cells; HGB, hemoglobin; RDW, red blood cell distribution width; PLT, platelets; NLR, neutrophil-to-lymphocyte ratio; MLR, monocyte-to-lymphocyte ratio; PLR, platelet-to-lymphocyte ratio; SII, systemic immune inflammation index; SIRI, systemic inflammation response index; ALT, alanine aminotransferase; AST, aspartate aminotransferase; ALB, albumin; TBIL, total bilirubin; ALP, alkaline phosphatase; TBA, total bile acids; BUN, blood urea nitrogen; SCr, serum creatinine; eGFR, estimated glomerular filtration rate; UA, uric acid; RBP, retinol-binding proteins; CysC, cystatin C; PT, prothrombin time; PTA, prothrombin time activity; INR, international normalized ratio; APTT, partial thromboplastin time; FBG, fibrinogen; TT, thrombin time; PTCD, percutaneous transhepatic cholangial drainage.

**Figure S2：**Multicollinearity check

**Abbreviations:** NSAIDs non-steroidal anti-inflammatory drugs; ACEI/ARB, angiotensin-converting enzyme inhibitors and angiotensin receptor blockers; WBC, white blood cells; RBC, red blood cells; HGB, hemoglobin; RDW, red blood cell distribution width; PLT, platelets; NLR, neutrophil-to-lymphocyte ratio; MLR, monocyte-to-lymphocyte ratio; PLR, platelet-to-lymphocyte ratio; SII, systemic immune inflammation index; SIRI, systemic inflammation response index; ALT, alanine aminotransferase; AST, aspartate aminotransferase; ALB, albumin; TBIL, total bilirubin; ALP, alkaline phosphatase; TBA, total bile acids; BUN, blood urea nitrogen; SCr, serum creatinine; eGFR, estimated glomerular filtration rate; UA, uric acid; RBP, retinol-binding proteins; CysC, cystatin C; PT, prothrombin time; PTA, prothrombin time activity; INR, international normalized ratio; APTT, partial thromboplastin time; FBG, fibrinogen; TT, thrombin time; PTCD, percutaneous transhepatic cholangial drainage.

**Figure S3：**ROC curve for bootstrap validation.
